# Supplementary material
Source: HighWire-hosted journal article supplement (https://bmjopen.bmj.com/content/12/9/e061337)
Supplement: inline-supplementary-material-2 [file inline-supplementary-material-2.pdf]

**Proefpersoneninformatie voor deelname aan medisch-wetenschappelijk onderzoek****CYTOSORB-HF TRIAL**

**Titel:** Preventie van vasoplegie (de bloedvaten kunnen niet meer goed samenknijpen waardoor er lage bloeddruk ontstaat) na een hartoperatie met het gebruik van het CytoSorb filter

**Hoofdonderzoeker LUMC:** Dr. M. Palmen

Geachte heer/mevrouw,

Wij vragen u om mee te doen aan een medisch-wetenschappelijk onderzoek dat momenteel op de afdeling Thoraxchirurgie plaatsvindt. U ontvangt deze brief omdat bij u hartfalen is vastgesteld waarvoor u binnenkort een hartoperatie ondergaat. Het onderzoek heeft op deze doelgroep betrekking.

Meedoen aan het onderzoek is vrijwillig. Om mee te doen is wel uw schriftelijke toestemming nodig. Voordat u beslist of u wilt meedoen aan dit onderzoek, krijgt u informatie over wat het onderzoek inhoudt. Lees deze informatie rustig door en vraag uw chirurg of het onderzoeksteam om uitleg als u vragen heeft. U kunt ook de onafhankelijk deskundige voor dit onderzoek om aanvullende informatie vragen. Alle contactgegevens vindt u in bijlage A bij deze brief. U kunt ook met uw partner, vrienden of familie over meedoen aan dit onderzoek praten.

Algemene informatie over meedoen aan medisch-wetenschappelijk onderzoek vindt u op de website van de Rijksoverheid: [www.rijksoverheid.nl/mensenonderzoek](http://www.rijksoverheid.nl/mensenonderzoek).

Wanneer u voldoende bedenktijd (tenminste 24 uur) heeft gehad, wordt u gevraagd te beslissen over deelname aan dit onderzoek. Door uw schriftelijke toestemming geeft u aan dat u de informatie heeft begrepen en instemt met deelname aan het onderzoek. Zowel uzelf als de onderzoeker ontvangen een getekende versie van deze toestemmingsverklaring.

## 1. Algemene informatie

Dit onderzoek wordt uitgevoerd in het Leids Universitair Medisch Centrum (LUMC). In totaal zullen 36 patiënten met hartfalen meedoen.

De medisch-ethische toetsingscommissie Leiden Den Haag Delft (METC LDD) heeft dit onderzoek goedgekeurd.

Algemene informatie over de toetsing van onderzoek vindt u op de website van de Rijksoverheid: [www.rijksoverheid.nl/mensenonderzoek](http://www.rijksoverheid.nl/mensenonderzoek).

## 2. Doel van het onderzoek

Het doel van dit onderzoek is uitzoeken of het gebruik van een speciaal filter tijdens een hartoperatie voor hartfalen het optreden van een ernstige complicatie, vasoplegie genaamd, kan voorkomen.

## 3. Achtergrond van het onderzoek

Vasoplegie is een veel voorkomende complicatie na een hartoperatie voor hartfalen. Bij vasoplegie kunnen de bloedvaten niet meer goed samenknijpen waardoor er lage bloeddruk ontstaat die zich soms moeilijk laat behandelen met medicijnen. Een van de oorzaken van deze complicatie is waarschijnlijk het gebruik van de hart-long machine, een apparaat dat tijdens de operatie de functie van het hart en de longen overneemt. Het bloed komt dan in aanraking met een lichaamsvreemde omgeving en dit kan een reactie van het immuunsysteem veroorzaken. Voor deze reactie zijn patiënten met hartfalen extra gevoelig.

Het CytoSorb filter is een filter dat in de hart-long machine kan worden ingebouwd en dat de reactie van het immuunsysteem kan verminderen. Het filter is reeds enige tijd op de markt beschikbaar en is ook al tijdens vele hartoperaties gebruikt. Er zijn echter nog geen studies uitgevoerd om bij patiënten met hartfalen te onderzoeken of het gebruik van dit filter leidt tot het minder vaak voorkomen van vasoplegie na de hartoperatie.

## 4. Wat meedoen inhoudt

### Hoe wordt het onderzoek uitgevoerd?

Indien u besluit aan het onderzoek deel te nemen, zal door loting worden bepaald of tijdens uw hartoperatie het CytoSorb filter wel of niet wordt gebruikt. De kans dat het filter bij u wordt gebruikt is even groot als de kans dat het niet wordt gebruikt. De deelnemers aan het onderzoek worden zo in twee gelijke groepen verdeeld. Door vergelijking van de groepen kan worden onderzocht of het gebruik van het filter minder vaak vasoplegie tot gevolg heeft.

U weet niet in welke groep u zit. Als u het belangrijk vindt, kan dit wel worden verteld nadat het onderzoek is afgelopen.

### Procedures voor het onderzoek anders dan bij gebruikelijke zorg

Het onderzoek start op de dag van de hartoperatie (dag 0). U gaat naar de operatiekamer. Als

u hier bent aangekomen, wordt er standaard een dun slangetje in een slagader (arterieelijn) geplaatst voor het controleren van uw bloed tijdens de operatie. Via deze arterieelijn wordt een extra buisje bloed (20 ml) afgenomen voor het onderzoek. Vervolgens wordt er een filmpje gemaakt van uw bloedcirculatie. Dit zal met een speciale camera worden uitgevoerd die de kleine bloedvaatjes onder uw tong zal registreren. Na het toedienen van alle medicijnen die u standaard voor de operatie krijgt, wordt er nogmaals een extra buisje bloed afgenomen. Vervolgens wordt er voor dit onderzoek een extra test uitgevoerd om te zien hoe uw bloedvaten reageren op een medicijn (fenylefrine) dat ervoor zorgt dat de bloeddruk tijdelijk stijgt en dat het hart sneller gaat kloppen. Dit medicijn wordt toegediend via een infuus dat u standaard krijgt. Tijdens deze test zal er nogmaals een filmpje onder uw tong worden gemaakt. De anesthesist zal u hierna in slaap maken voor de hartoperatie. De hartoperatie zal vervolgens, behalve dat het CytoSorb filter wel of niet zal worden gebruikt, volgens de standaard procedure worden uitgevoerd. Tenslotte zal aan het einde van de hartoperatie er nogmaals een extra buisje bloed worden afgenomen en zullen de test met fenylefrine en het filmpje van uw bloedcirculatie nogmaals plaatsvinden.

Dag 1 is de dag na de hartoperatie. 's Ochtends wordt via de arterieelijn (die u dan nog steeds heeft) weer een extra buisje bloed afgenomen voor het onderzoek. Daarnaast wordt nogmaals de test met fenylefrine via het standaard infuus uitgevoerd en het filmpje van uw bloedcirculatie gemaakt.

Op dag 4 wordt er voor een laatste maal een extra buisje bloed afgenomen. De test met fenylefrine wordt nu niet meer herhaald. Op dezelfde dag zal er wel nogmaals een filmpje van uw bloedcirculatie worden gemaakt.

Een overzicht met alle onderzoeksmetingen/ -handelingen vindt u in bijlage B.

### **Verzamelen van medische gegevens**

Voor dit onderzoek worden gegevens over uw hartoperatie en uw herstel (bijv. het optreden van eventuele complicaties) verzameld tot 30 dagen na uw operatie. Dit betekent dat wanneer u na uw hartoperatie in het LUMC mogelijk naar uw eigen ziekenhuis wordt overgeplaatst, deze klinische gegevens bij uw cardioloog/in uw eigen ziekenhuis zullen worden opgevraagd. Na 30 dagen zult u ook thuis worden opgebeld om te vragen hoe het met u gaat. Bij eventuele nieuwe ziekenhuisopnamen of complicaties zullen de voor dit onderzoek belangrijke klinische gegevens worden opgevraagd bij uw behandelend arts.

## **5. Mogelijke bijwerkingen en nadelige effecten**

Het CytoSorb filter is een geregistreerd medisch hulpmiddel (dat wil zeggen dat het is voorzien van een CE-markering) dat al geruime tijd op de markt beschikbaar is. Het gebruik van dit filter wordt als veilig beschouwd en er zijn geen grote risico's of bijwerkingen bekend. In zeldzame gevallen zou een overgevoeligheidsreactie kunnen optreden, maar dit is nog niet eerder gemeld.

De mogelijke bijwerkingen van het medicijn fenylefrine dat tijdens de extra testen wordt gebruikt zijn: tijdelijk hoge bloeddruk, hoofdpijn, misselijkheid, hartkloppingen, trage hartslag, lage bloeddruk, zweten. Deze eventuele bijwerkingen verdwijnen binnen enkele minuten.

Er zijn geen mogelijke nadelige effecten van het gebruik van de camera om uw bloedcirculatie te registreren.

## 6. Mogelijke voordelen

Wanneer het CytoSorb filter wordt gebruikt kan dit leiden tot het voorkomen van vasoplegie, een ernstige complicatie na het ondergaan van een hartoperatie, maar dit is niet zeker. Bovendien kan uw deelname aan het onderzoek bijdragen aan het ontdekken van mogelijkheden om vasoplegie te voorkomen, wat leidt tot meer veilige operaties en een verbeterd klinisch resultaat.

## 7. Als u niet wilt meedoen of wilt stoppen met het onderzoek

U beslist zelf of u meedoet aan het onderzoek. Deelname is vrijwillig. Als u niet wilt meedoen, wordt uw hartoperatie op de gebruikelijke manier uitgevoerd. Er zal dan tijdens de operatie geen gebruik worden gemaakt van het CytoSorb filter. Als u wel meedoet, kunt u zich altijd bedenken en toch stoppen, ook tijdens het onderzoek. U wordt dan verder op de gebruikelijke manier behandeld. U hoeft niet te zeggen waarom u stopt. Wel moet u dit direct melden aan het onderzoeksteam.

Als er nieuwe informatie over het CytoSorb filter of het onderzoek beschikbaar komt die belangrijk voor u is, laat het onderzoeksteam dit aan u weten. U wordt dan, indien dit van toepassing is, gevraagd of u blijft meedoen.

## 8. Einde van het onderzoek

Uw deelname aan het onderzoek stopt als:

- alle metingen voor het onderzoek voorbij zijn (dit is 30 dagen na uw hartoperatie),
- u zelf kiest om te stoppen,
- uw chirurg of het onderzoeksteam het beter voor u vindt om te stoppen,
- het LUMC, de overheid of de beoordelende medisch-ethische toetsingscommissie, besluit om het onderzoek te stoppen.

Het hele onderzoek is afgelopen als alle 36 deelnemers klaar zijn.

## 9. Gebruik en bewaren van uw gegevens en lichaamsmateriaal

Voor dit onderzoek worden door het onderzoeksteam in het LUMC uw persoonsgegevens verzameld, verwerkt en bewaard. Het gaat hierbij om gegevens zoals uw naam, geboortedatum, en om gegevens over uw hartoperatie en gezondheid. Daarnaast is voor dit onderzoek ook bloed (lichaamsmateriaal) nodig dat in het LUMC zal worden geanalyseerd. Het verzamelen, verwerken en bewaren van uw persoonsgegevens en bloed is nodig om de vragen die in dit onderzoek worden gesteld te kunnen beantwoorden en de resultaten te kunnen publiceren. Wij vragen voor dit gebruik en bewaren van uw gegevens en bloed uw toestemming.

### Vertrouwelijkheid van uw gegevens en lichaamsmateriaal

Om uw privacy te beschermen krijgen uw gegevens en het extra bloed dat bij u wordt afgenomen een code. Uw naam en andere gegevens die u direct kunnen identificeren worden daarbij weggelaten. Alleen met de sleutel van de code zijn de gegevens voor het onderzoek tot u te herleiden. De sleutel van de code blijft veilig en op een andere plaats dan de onderzoeksgegevens opgeborgen in het

LUMC. Uw gecodeerde onderzoeksgegevens blijven in het LUMC en zullen door het onderzoeksteam worden verwerkt tot rapporten en publicaties. In deze rapporten en publicaties over het onderzoek zijn de gegevens niet tot u te herleiden.

#### **Toegang tot uw gegevens voor controle**

Sommige personen kunnen in het LUMC toegang krijgen tot al uw gegevens. Ook tot de gegevens zonder code. Dit is nodig om te kunnen controleren of het onderzoek goed en betrouwbaar is uitgevoerd. Personen die ter controle inzage krijgen in uw gegevens zijn: een monitor die voor LUMC werkt, nationale en internationale toezichthoudende autoriteiten, bijvoorbeeld, de Inspectie Gezondheidszorg en Jeugd. Zij houden uw gegevens geheim. Wij vragen u voor deze inzage toestemming te geven.

#### **Bewaartermijn gegevens en lichaamsmateriaal**

Uw gegevens moeten 15 jaar worden bewaard op de onderzoekslocatie (het LUMC). Ook het bloed dat bij u wordt afgenomen zal niet onmiddellijk na de bloedbepalingen worden vernietigd. Het wordt bewaard om daarop in de loop van dit onderzoek en daarna (tot 15 jaar na uw hartoperatie) nog nieuwe bepalingen te kunnen doen die te maken hebben met dit onderzoek.

#### **Gebruik van gegevens en lichaamsmateriaal voor ander onderzoek**

Uw gegevens en bloed kunnen na afloop van dit onderzoek ook nog van belang zijn voor ander medisch-wetenschappelijk onderzoek op het gebied van hartoperaties en/of hartfalen. U kunt op het toestemmingsformulier aangeven of u wel of niet instemt met het gebruik van uw gegevens voor toekomstig onderzoek. Indien u hier niet mee instemt, kunt u gewoon deelnemen aan het huidige onderzoek.

#### **Intrekken toestemming**

U kunt uw toestemming voor gebruik van uw gegevens en bloed altijd weer intrekken. Dit geldt voor dit onderzoek en ook voor het bewaren en het gebruik voor toekomstig onderzoek. De onderzoeksgegevens die zijn verzameld tot het moment dat u uw toestemming intrekt worden nog wel gebruikt in dit onderzoek. Uw bloed wordt na intrekking van uw toestemming vernietigd. Als er al bloedbepalingen zijn gedaan, dan worden die gegevens nog wel gebruikt.

#### **Meer informatie over uw rechten bij verwerking van gegevens**

Bij vragen over de verwerking van uw persoonsgegevens kunt u contact opnemen met het onderzoeksteam. Voor algemene vragen of klachten over de verwerking van uw gegevens kunt u ook contact opnemen met de functionaris gegevensbescherming van het LUMC. Bekijk voor meer informatie over privacy het privacy statement van het LUMC op de LUMC-website. Tenslotte kunt u voor algemene informatie over uw rechten bij verwerking van uw gegevens de website van de Autoriteit Persoonsgegevens raadplegen. U vindt alle contactgegevens in bijlage A.

#### **Registratie van het onderzoek**

Informatie over dit onderzoek is ook opgenomen in een overzicht van medisch-wetenschappelijke onderzoeken, te vinden via de website van de Centrale Commissie Mensgebonden Onderzoek. Daarin zijn geen gegevens opgenomen die naar u herleidbaar zijn. Na het onderzoek kan de website

een samenvatting van de resultaten van dit onderzoek tonen. U vindt dit onderzoek onder CytoSorb-HF Trial.

#### **10. Verzekering voor proefpersonen**

Voor iedereen die meedoet aan dit onderzoek is een verzekering afgesloten. De verzekering dekt schade door het onderzoek. Niet alle schade is gedekt. In bijlage C vindt u meer informatie over de verzekering en de uitzonderingen. Daar staat ook aan wie u schade kunt melden.

#### **11. Informeren huisarts en/of behandelend specialist**

Wij informeren bij ontslag uit het LUMC uw huisarts en uw cardioloog dat u aan het onderzoek heeft deelgenomen. Indien nodig, zullen wij contact met uw huisarts of cardioloog opnemen, bijvoorbeeld als er gegevens over uw gezondheid of medicijngebruik voorafgaand aan uw hartoperatie ontbreken of als er vragen zijn over uw herstel na uw hartoperatie (tot 30 dagen na uw operatie).

#### **12. Geen vergoeding voor meedoen**

Het eventueel gebruik maken van het CytoSorb filter en de extra procedures (bloedafnamen, extra testen met fenylefrine) voor het onderzoek kosten u niets. U wordt niet betaald voor het meedoen aan dit onderzoek.

#### **13. Heeft u vragen?**

Bij vragen kunt u contact opnemen met het onderzoeksteam. Voor onafhankelijk advies over meedoen aan dit onderzoek kunt u terecht bij de onafhankelijke deskundige. Hij weet veel over het onderzoek, maar heeft niets met dit onderzoek te maken.

Indien u een klacht heeft over het onderzoek en dit liever niet wilt bespreken met het onderzoeksteam, dan kunt u contact opnemen met de klachtenfunctionaris van het LUMC. De contactgegevens vindt u in bijlage A.

**Bijlage A: Contactgegevens LUMC****Hoofdonderzoeker:**

Dr. M. Palmen, cardiothoracaal chirurg  
Afdeling Thoraxchirurgie, LUMC  
Telefoon: 071 526 4022 (secretaresse)  
E-mail: m.palmen@lumc.nl

**Coördinator onderzoek:**

Mevr. drs. E.F. Bruggemans  
Afdeling Thoraxchirurgie, LUMC  
Telefoon: 071 526 4581 of 526 4022 (secretaresse)  
E-mail: e.f.bruggemans@lumc.nl

**Onafhankelijk deskundige:**

Dr. J.Hjortnaes, cardiothoracaal chirurg  
Afdeling Thoraxchirurgie, LUMC  
Telefoon: 071 526 4022 (secretaresse)  
E-mail: j.hjortnaes@lumc.nl

**Klachten:**

In geval van klachten over het onderzoek kunt u zich wenden tot de klachtenfunctionaris van het LUMC via e-mail: klachtenfunctionaris@lumc.nl. U kunt ook telefonisch contact opnemen met het secretariaat van het Directoraat Kwaliteit en Patiëntveiligheid (071-5264646; tijdens kantooruren). Zij zullen u doorverbinden naar de dienstdoende klachtenfunctionaris.

**Functionaris voor de Gegevensbescherming van de instelling:**

Wanneer u vragen heeft over de bescherming van uw privacy kunt u per email contact opnemen met de functionarissen gegevensbescherming van het LUMC via [infoavg@lumc.nl](mailto:infoavg@lumc.nl)

Voor meer informatie over uw rechten zie de LUMC-website:

[www.lumc.nl/over-het-lumc/privacy/](http://www.lumc.nl/over-het-lumc/privacy/)

**Contactgegevens LUMC**

Albinusdreef 2  
2333 ZA Leiden  
Centraal telefoonnummer: (071) 526 91 11  
Voor meer informatie over uw rechten zie de website van het LUMC  
<https://www.lumc.nl/12367/Deelnemers-wetenschappelijk-onderzoek/>

**Bijlage B: Overzicht van de onderzoeksmetingen en -handelingen**

| Moment<br>Behandelingen | Dag van de operatie (Dag 0) |               |                                       |                | Dag 1          | Dag 4 |
|-------------------------|-----------------------------|---------------|---------------------------------------|----------------|----------------|-------|
|                         | Vóór anesthesie             | Na anesthesie | Hart-longmachine Wel of geen CytoSorb | Einde operatie | Intensive Care |       |
| Fenylefrine test        |                             | X             |                                       | X              | X              |       |
| Bloedmonster            | X                           | X             |                                       | X              | X              | X     |
| Filmpje bloedcirculatie | X                           | X             |                                       | X              | X              | X     |



### Bijlage C: Informatie over de verzekering

LUMC heeft een verzekering afgesloten voor iedereen die meedoet aan het onderzoek. De verzekering betaalt de schade die u heeft doordat u aan het onderzoek meedeed. Het gaat om schade die u krijgt tijdens het onderzoek, of binnen 4 jaar na het onderzoek. U moet schade binnen 4 jaar melden bij de verzekeraar.

Heeft u schade door het onderzoek? Meld dit dan bij deze verzekeraar:

Naam: Centramed  
Adres: Maria Montessorilaan 9, 2719 DB Zoetermeer  
Telefoonnummer: 070 301 70 70  
E-mail: info@centramed.nl  
Polisnummer: 624.530.305

De verzekering betaalt maximaal € 650.000 zijn per persoon en € 5.000.000 voor het hele onderzoek (en € 7.500.000 per jaar voor alle onderzoeken van dezelfde opdrachtgever).

Let op: de verzekering dekt de volgende schade **niet**:

- Schade door een risico waarover we u informatie hebben gegeven in deze brief. Maar dit geldt niet als het risico groter bleek te zijn dan we van tevoren dachten. Of als het risico heel onwaarschijnlijk was.
- Schade aan uw gezondheid die ook zou zijn ontstaan als u niet aan het onderzoek had meegedaan.
- Schade die ontstaat doordat u aanwijzingen of instructies niet of niet goed opvolgde.
- Schade aan de gezondheid van uw kinderen of kleinkinderen.
- Schade door een behandelmethode die al bestaat. Of door onderzoek naar een behandelmethode die al bestaat.

Deze bepalingen staan in het 'Besluit verplichte verzekering bij medisch-wetenschappelijk onderzoek met mensen 2015'. Dit besluit staat in de Wettenbank van de overheid (<https://wetten.overheid.nl>).

**TOESTEMMINGSFORMULIER****CytoSorb-HF Trial**

- Ik heb de informatiebrief gelezen. Ook kon ik vragen stellen. Mijn vragen zijn voldoende beantwoord. Ik had genoeg tijd om te beslissen of ik meedoe.
- Ik weet dat meedoen vrijwillig is. Ook weet ik dat ik op ieder moment kan beslissen om toch niet mee te doen of te stoppen met het onderzoek. Daarvoor hoef ik geen reden te geven.
- Ik geef toestemming voor het informeren van mijn huisarts/specialist(en) die mij behandelt dat ik meedoe aan dit onderzoek.
- Ik geef toestemming voor het opvragen van informatie bij mijn huisarts/specialist(en) die mij behandelt gedurende de eerste 30 dagen na mijn hartoperatie.
- Ik geef toestemming voor het verzamelen en gebruiken van mijn gegevens en bloedmonsters voor de beantwoording van de onderzoeksvraag in dit onderzoek.
- Ik geef toestemming om mijn gegevens op de onderzoekslocatie (het LUMC) nog 15 jaar na dit onderzoek te bewaren.
- Ik weet dat voor de controle van het onderzoek sommige mensen toegang tot al mijn gegevens kunnen krijgen. Die mensen staan vermeld in deze informatiebrief. Ik geef toestemming voor die inzage door deze personen.
- Ik geef toestemming voor het informeren van mijn huisarts en/of behandelend specialist van onverwachte bevindingen die van belang (kunnen) zijn voor mijn gezondheid.
- Ik geef  **wel**  
 **geen**  
toestemming om mijn persoonsgegevens langer te bewaren en te gebruiken voor toekomstig onderzoek op het gebied van hartoperaties en/of hartfalen.
- Ik geef  **wel**  
 **geen**  
toestemming om mijn bloed na dit onderzoek te bewaren en om dit later nog voor ander onderzoek te gebruiken, zoals in de informatiebrief staat.
- Ik geef  **wel**  
 **geen**  
toestemming om mij na dit onderzoek opnieuw te benaderen voor een vervolgonderzoek.

- Ik wil  **wel**  
 **niet**  
geïnformeerd worden over welke behandeling ik heb gehad/in welke groep ik zat.
- Ik wil meedoen aan dit onderzoek.

Naam proefpersoon:

Handtekening:

Datum: \_\_ / \_\_ / \_\_

- Ik verklaar dat ik deze proefpersoon volledig heb geïnformeerd over het genoemde onderzoek.
- Als er tijdens het onderzoek informatie bekend wordt die de toestemming van de proefpersoon zou kunnen beïnvloeden, dan breng ik hem/haar daarvan tijdig op de hoogte.

Naam onderzoeker (of diens vertegenwoordiger):

Handtekening:

Datum: \_\_ / \_\_ / \_\_

*De proefpersoon krijgt een volledige informatiebrief mee, samen met een getekende versie van het toestemmingsformulier.*
